# Supplementary material for: PD-1 Cellular Nanovesicles Carrying Gemcitabine to Inhibit the Proliferation of Triple Negative Breast Cancer Cell
Source: MDPI journal article supplement (doi:10.3390/pharmaceutics14061263), 2022-06-14
Supplement: s1 [file s1]

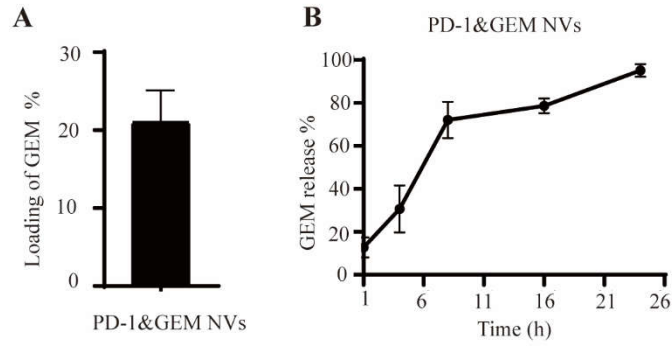

**Figure S1. In vitro loading and release of GEM-carried PD-1 NVs.** (A) The capacity of GEM-loaded PD-1 NVs by electroporation (n = 3). (B) The release profiles of GEM from PD-1 NVs at different time (1 h, 4 h, 8 h, 16 h, 24 h) (n = 3).

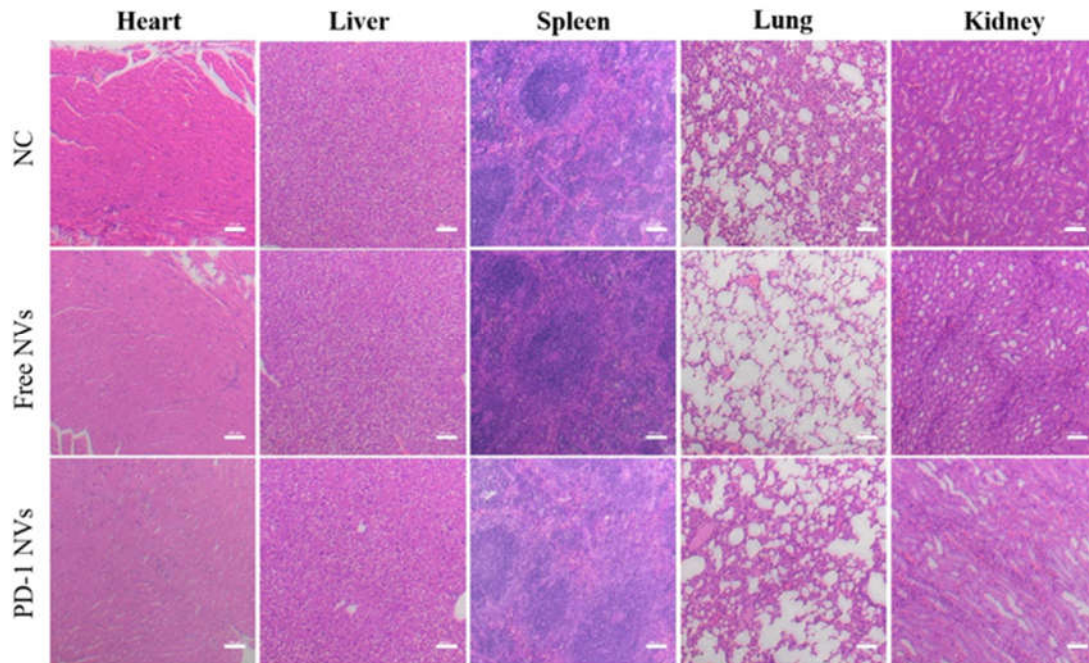

**Figure S2. In vivo toxicity tests for PD-1 NVs.** Histological images for H&E staining obtained from the lung, heart, kidney, spleen and liver of mice treated with different NVs at day 20 post-injection. Scale bar: 100  $\mu$ m.
